# Supplementary material for: The&nbsp;Effect of Schistosomiasis and Soil-transmitted Helminths on Expressive Language Skills Among Isizulu Speaking Preschool Children
Source: Research Square preprint supplement (doi:10.21203/rs.3.rs-101268/v1), 2020-11-05
Supplement: Supplementary file 1 [file 5ecf3984a571ef73e7cd3ad0.docx]

**Appendix A : Adapted Developmental Language Test Illustrations Picture C Picture D**


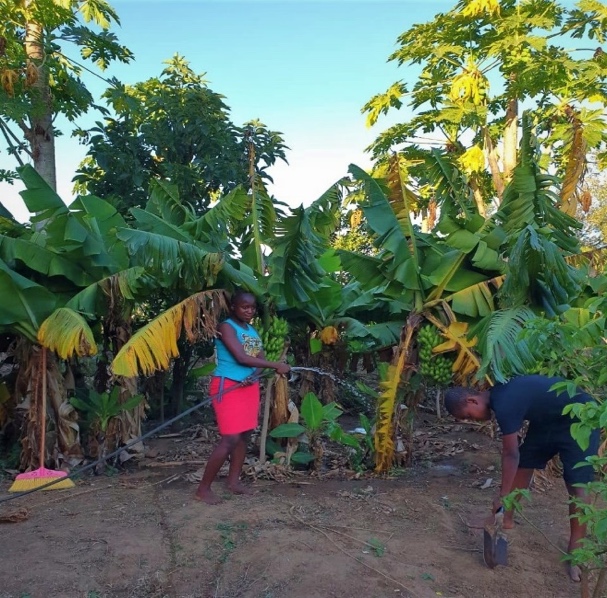

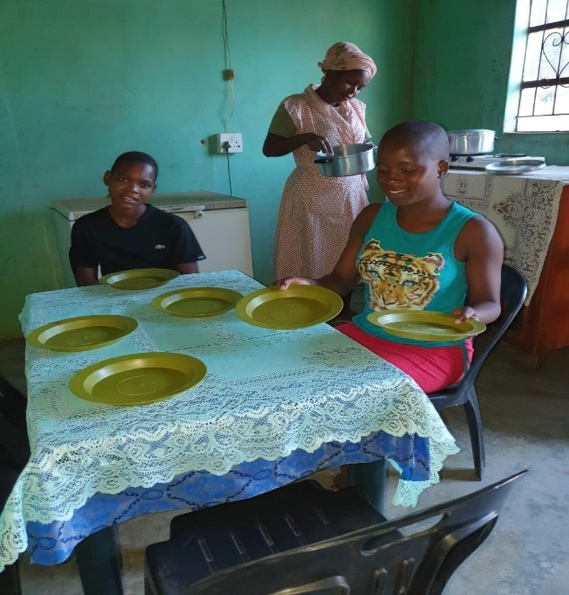


**Picture A Picture B**


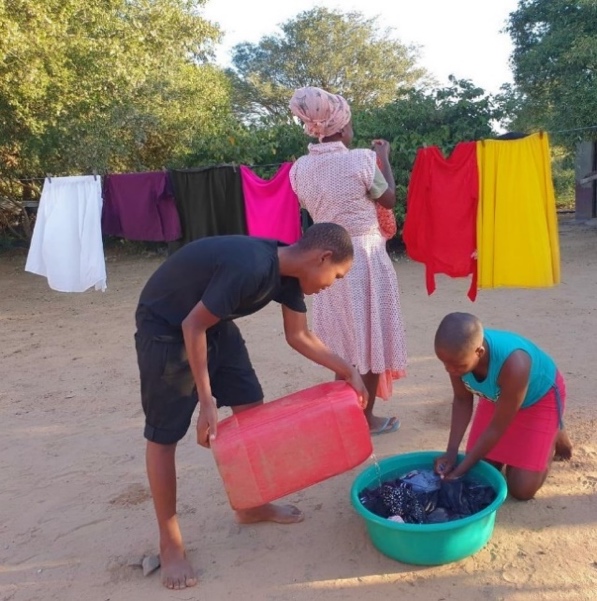

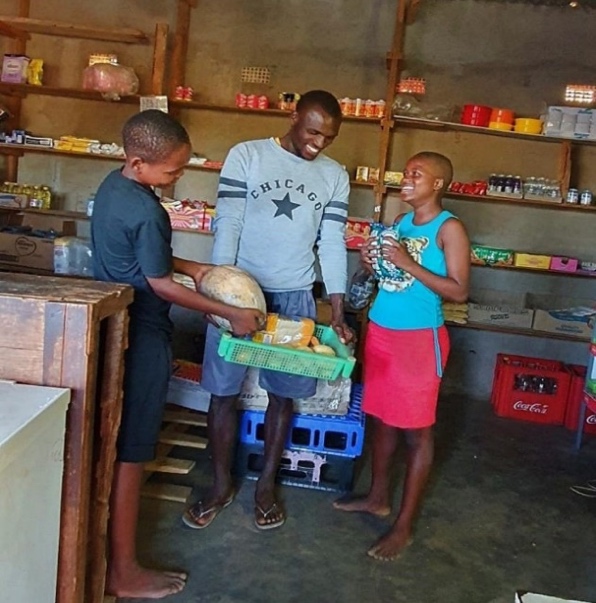


**APPENDIX B: Developmental Language test (Complete version Adapted for Ingwavuma)**

**SECTION A**

Purpose: Establish rapport &introduce the narrative

1. **Instruction: Can you sing a song you like or say your favourite nursery rhyme?**

*Unalo iculo olithandayo esingalicula ndawonye noma umlolozelo esingawusho sobabili?*

| **Item** | **Description** | **Score** | | |
| --- | --- | --- | --- | --- |
| **1**  Song | Song or rhyme production. | **2** | ***1*** | ***0*** |
| *song or rhyme clear with enjoyment* | *sings but lacks clarity* | *unable to perform* |

1. ***Instruction: Show all pictures to the child then proceed with questions:***

*Akubuke lezizithombe. Lona umndeni wakwa Mthembu. Kukhona ubaba Kanye nomama, kuthiwa umama nonkosikazi Mthembu nomfana obizwa ngokuthi uThemba nentombazane ebizwa ngokuthi uNosipho.*

| **Item** | **Description** | ***Score*** | | | |
| --- | --- | --- | --- | --- | --- |
| 2. Names | *a.* Can you tell me who the people in our story are and what their names are?  *Ungasho ukuthi bangobani labantu? nokuthi bangobani amagama abo?* | ***3*** | ***2*** | ***1*** | ***0*** |
| *All characters & their names correct* | *all people correct, some names correct* | *some people, and some names correct* | *No response* |

**SECTION A TOTAL SCORE:___/5**

**SECTION B**

**Picture A:**

| **Item** | **Description** | ***Score*** | | | |
| --- | --- | --- | --- | --- | --- |
| 3.1  *Follows 2- and 3- part commands* | a. Please show me Mrs Mthembu, then show me Nosipho and lastly show me Themba  *Ngikhombisa umama Mthembu, bese ungikhombisa uNosipho, ugcine ngokungikhombisa uThemba.* | *3* | *2* | *1* | *0* |
| *all correct* | *all shown, but order incorrect* | *Two people shown in correct order* | *No response* |

| 3.2  WH Q | *Bakuphi?* (where are they?) | 1 | *0* |
| --- | --- | --- | --- |
| *Benzani?* (what are they doing?) | 1 | 0 |
| *Bakwenzelani lokho?* (why are they doing that?) | 1 | 0 |
|  | *Ubani owasha/ oshuka izingubo*? (who is washing the clothes?) | 1 | 0 |
|  | *Uzineka kuphi unkosikazi Ndaba izingubo?* (where is she going to hang the clothes?) | 1 | 0 |
|  | *Ukwenzelani lokho?* (why is she hanging them there and not on the tree?) | 1 | 0 |

| 3.3  *Recognizes*  *colors* | *Ungangikhombisa into emnyama esithombeni?* (show me something black) | *1* | *0* |
| --- | --- | --- | --- |
| *Ungangikhombisa into e orange*? (Show me something orange) | *1* | *0* |
| *Ungangikhombisa into emhlophe?* ( show me something white) | *1* | *0* |
|  | *Bumbala muni utshani?* (what colour is grass?) | *1* | *0* |
|  | *Uwumbala onjani lamaplate?* (What colour are the plates?) | *1* | *0* |

| 3.4  Counting 1-15 | C*ounting to 15.* | *3* | *2* | *1* | *0* |
| --- | --- | --- | --- | --- | --- |
| *counts to 15* | *counts to 10* | *counts to 5* | *less than 5/ NR* |

**SECTION B TOTAL SCORE:_____/17**

**SECTION C**

# Picture B

| **Item** | ***Description*** | | **Score** | |
| --- | --- | --- | --- | --- |
| 4.1 Identify object by name | *Ngikhombisa ifosholo (*Show me the spade) | | 1 | 0 |
| *Ngikhombisa umshanelo* (Show me the broom) | | 1 | 0 |
| *Ngikhombisa amahlamvu/ amacembe* (Show me leaves) | | 1 | 0 |
| 4.2 Understand object function | *Ubambeni/uphetheni uNosipho?* (What is Nosipho carrying?) | | 1 | 0 |
| *Eyokwenzani? (*What is it for?) | | 1 | 0 |
| *uyasiza yini umshanelo ensimini?* ( Can you use a broom in the garden?) | | 1 | 0 |
| Yini enye onganisela ngayo engadini? (What ese can you use to water plants) | | 1 | 0 |
| Elokwenzani ifosholo? (What is the spade used for?) | | 1 | 0 |
| 4.3 Understands differences in meaning OPPOSITES |  | *Ubani omile ubani obheke phansi?* (Who is standing up and who is looking down?) | 1 | 0 |
|  | *ungikhombise isibhakabhaka* (Show me what is above?/sky) | 1 | 0 |
| 1 | Ngikhombise inhlabathi (Show me the ground/ what is below?/ ground) | 1 | 0 |
|  | *Ngikhombise isihlahla esifishane* (Show me a short tree) | 1 | 0 |
|  | *Ngikhombise isihlahla eside* (Show me a tall tree) | 1 | 0 |
|  | *Sinaziphi isithelo isihlahla esiseduze kuka Nosipho?* (What fruit is hanging from the tree?) | 1 | 0 |

# SECTION C TOTAL SCORE:_____/14

# SECTION D

# Picture C

| **Item** | **Description** | ***Score*** | | | |
| --- | --- | --- | --- | --- | --- |
| 5.1  Fruit & vegetables *Naming* | *Yiziphi izithelo ozaziyo noma akhona ensimini ekhaya?*  (Can you tell me all the names of fruit you know/ have at home?) | *3* | 2 | 1 | 0 |
| *more than 4 correct* | *more than 2 correct* | *1 correct* | *None offered* |
| 5.2  Fruit/ Vegetable *Differentiation* | *Yimaphi amanye ama veji owaziyo noma akhona ensimini ekhaya?*  (Can you tell me all the names of Vegetables you know? Or have at home) | 3 | 2 | 1 | 0 |
| *more than 4 correct* | *more than 2 correct* | *1 correct* | *None offered* |
| 5.3  *Spontaneous*  Narratives | *Uke waya esitolo kothenga? Ngitshele/ngixoxele ngako.*  *(Have you been to the shops or market? Can you tell me about it?)*  *(Prompts if necessary: Uye kuphi? Waya nobani? Nafika kanjani esetolo? Nathengani?* | *3* | 2 | 1 | 0 |
| *Unprompted, 3 details* | *Prompted 3 details* | *Prompted less than 3 details* | *No response/ cannot relate* |

**SECTION D TOTAL SCORE: /9**

**SECTION E**

# Picture D

| **Item** | **Description** | **Score** | | | | | | | |
| --- | --- | --- | --- | --- | --- | --- | --- | --- | --- |
| 6.1. Counting OBJECTS | *Zingakhi izitsha ozibonayo etafuleni?* | **1** | | | | **0** | | | |
| Correct | | | | Incorrect | | | |
| 6.2. Associating  Colours | *Awumbala onjani amapuleti futhi kukhona yini omunye enye into ewumbala ofana nawo?*  *(What colour are the plates and what else in this room looks like them?)* | 2 | | 1 | | | | 0 | |
| Both answers correct | | 1 answer correct | | | | Both answers wrong | |
| 6.3.  Inferencing | *Ucabanga ukuthi lomndeni uzokwenzani manje? (What do you think the family is going to do next)* | 2 | | 1 | | | | 0 | |
| Answer makes sense, future tense | | Answer correct tense incorrect | | | | Answer incorrect | |
| 6.4.  Narratives | Ability to retell the whole story  *Ungangixoxela indaba yonke ngabakwenzile abakwa Mthembu ngomgqibelo ekuseni?* | **4** | 3 | | 2 | | 1 | | 0 |
| 4 events | 3 events | | 2 events | | 1 event | | Could not tell the story |

**TOTAL SCORE SECTION E:____/9**

**Overall Total : ________/54**
